# Supplementary material
Source: PubMed Central journal article supplement (PMC7436391)

A) IFN-gamma 2-hour

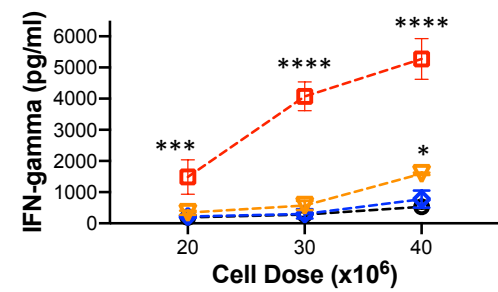

B) IL10 2-hour

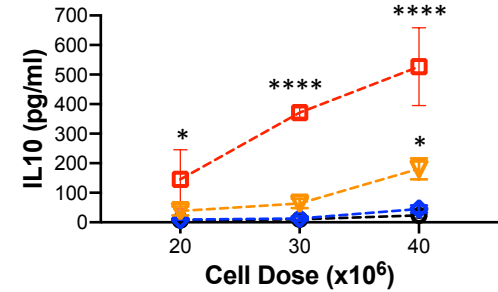

C) IL6 2-hour

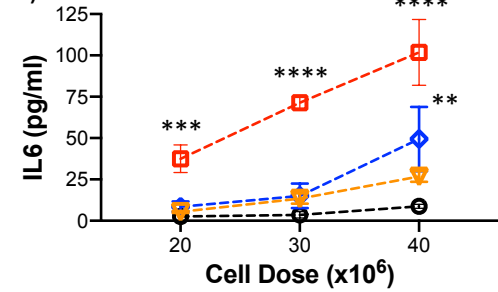

D) IL2 2-hour

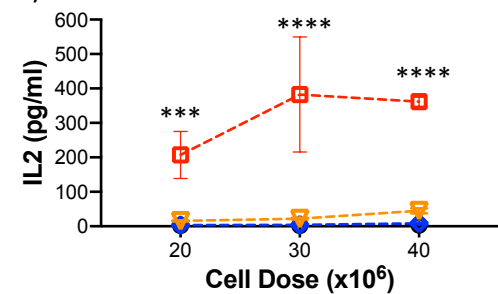

E) IL4 2-hour

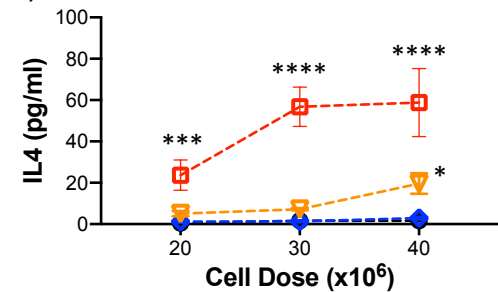

F) TNF 2-hour

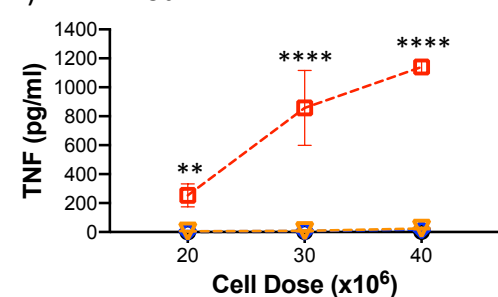

G) IFN-gamma 6-hour

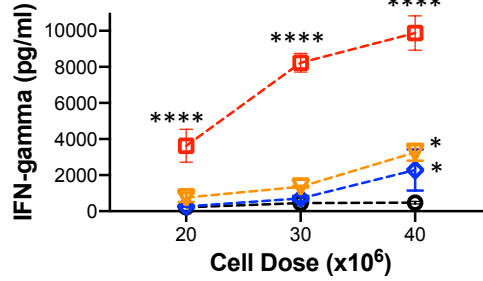

H) IL10 6-hour

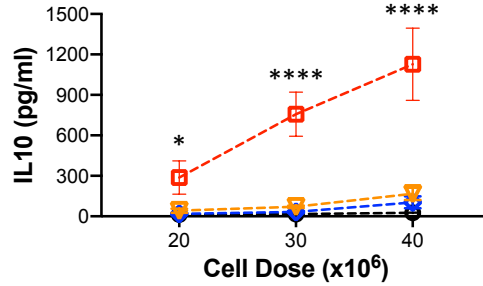

I) IL6 6-hour

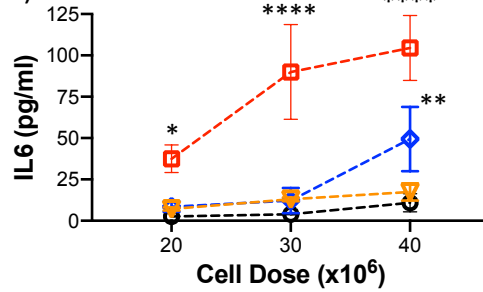

J) IL2 6-hour

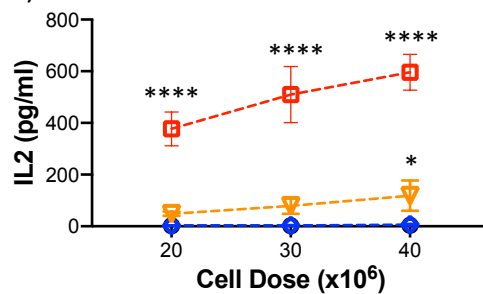

K) IL4 6-hour

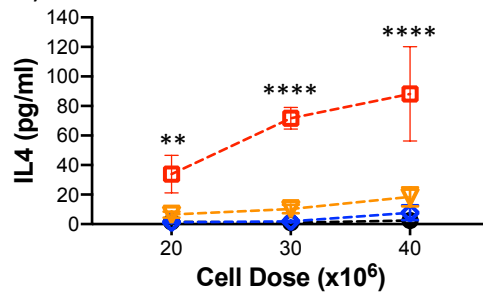

L) TNF 6-hour

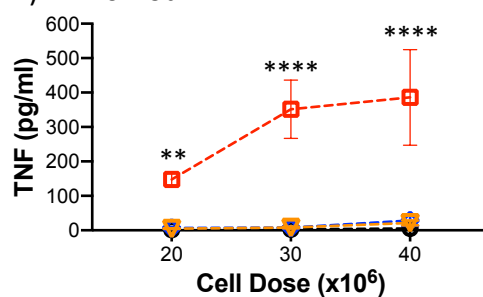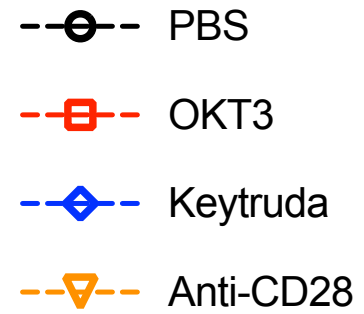M) 20x10<sup>6</sup> PBMC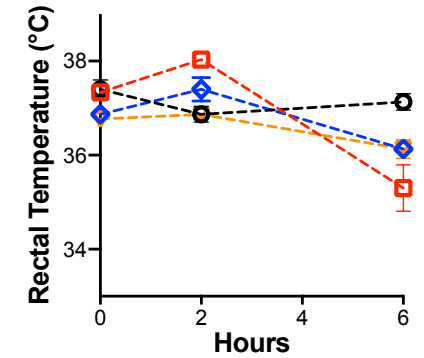N) 30x10<sup>6</sup> PBMC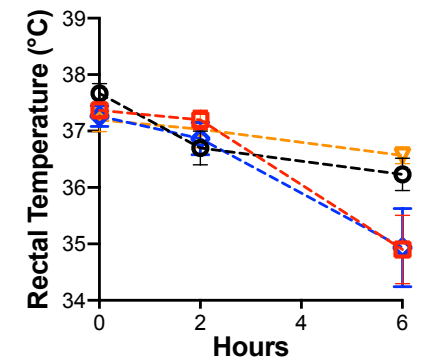O) 40x10<sup>6</sup> PBMC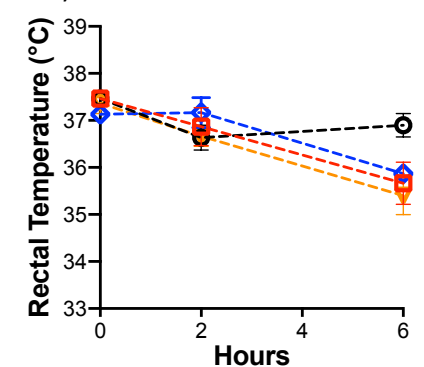

Supplement: FSB2-34-12963-s004.pdf [file FSB2-34-12963-s004.pdf]
