# Supplementary material
Source: PubMed Central journal article supplement (PMC7436391)

Supplemental Figure 2

A) Human IFN-gamma

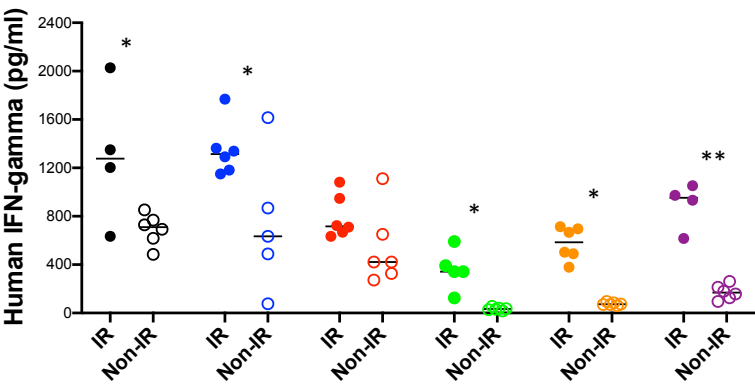

B) Human IL10

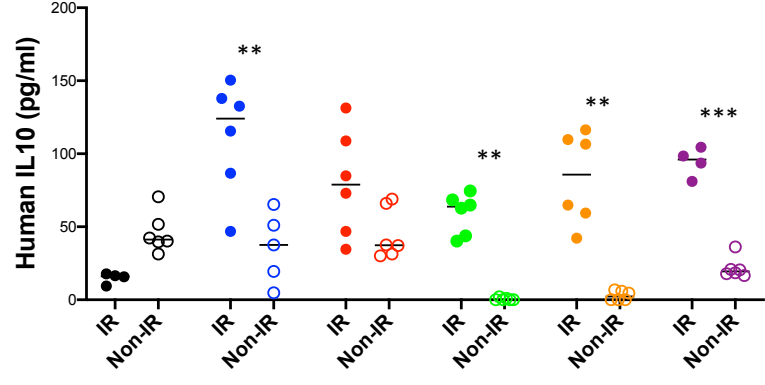

C) Human IL6

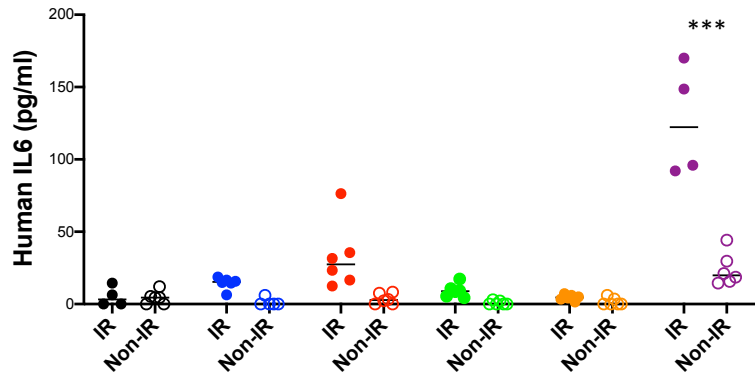

Donors

- 362 IR
- 362 non-IR
- 345 IR
- 345 non-IR
- 2785 IR
- 2785 non-IR
- 213 IR
- 213 non-IR
- 364 IR
- 364 non-IR
- 3251 IR
- 3251 non-IR

D) Human T cell levels in blood

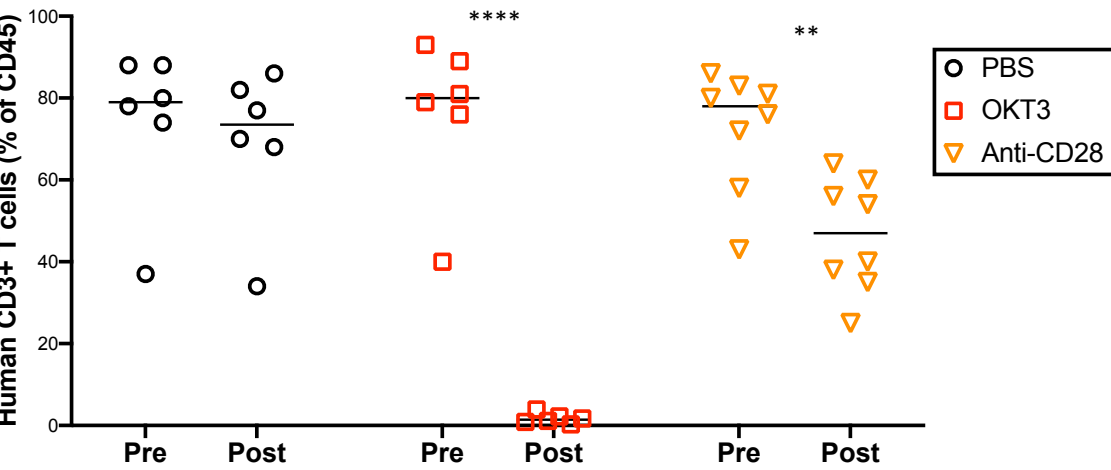

Supplement: FSB2-34-12963-s005.pdf [file FSB2-34-12963-s005.pdf]
